# Supplementary material for: IgG from Adult Atopic Dermatitis (AD) Patients Induces Nonatopic Neonatal Thymic Gamma–Delta T Cells (γδT) to Acquire IL-22/IL-17 Secretion Profile with Skin-Homing Properties and Epigenetic Implications Mediated by miRNA
Source: MDPI journal article supplement (doi:10.3390/ijms23126872), 2022-06-20
Supplement: s1 [file s1]

## **Supplementary Figures S1 to S4**

**Title:** IgG from adult atopic dermatitis (AD) patients induces non-atopic neonatal thymic gamma-delta T cells ( $\gamma\delta$ T) to acquire IL-22/IL-17 secretion profile with skin-homing properties and epigenetic implications mediated by miRNA

**Authors:** Beatriz Oliveira Fagundes; Thamires Rodrigues de Sousa; Andrezza Nascimento; Lorena Abreu Fernandes; Fábio da Ressureição Sgnotto; Raquel Leão Orfali, MD, PhD<sup>1</sup>; Valéria Aoki, MD, PhD; Alberto José da Silva Duarte, MD, PhD, Sabri Saeed Sanabani, PhD, and Jefferson Russo Victor, PhD.

**Figure S1**

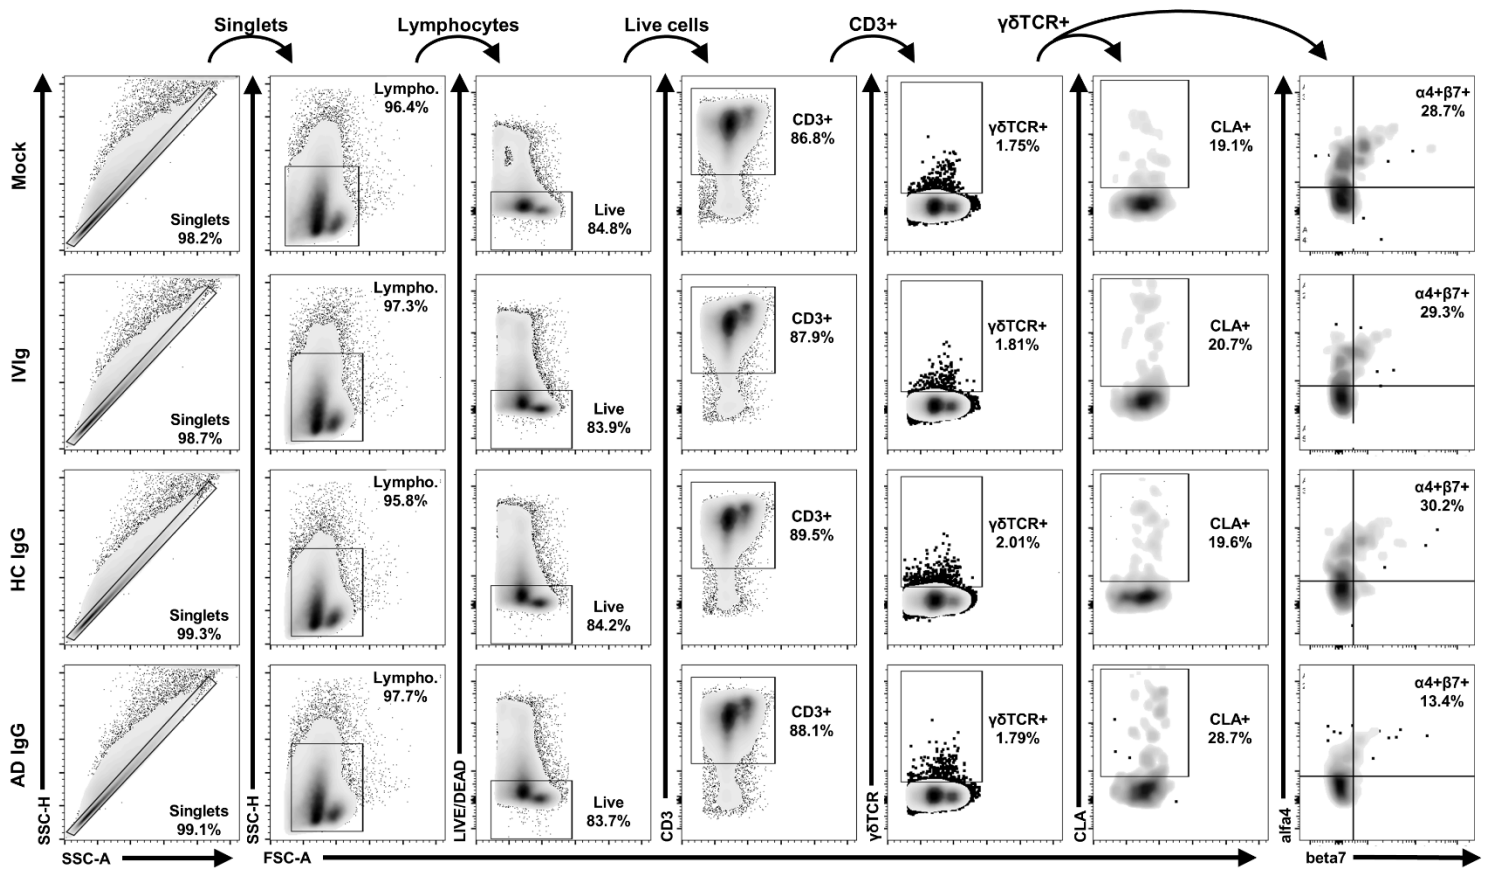

**Figure S1: Illustrative dot plots of the gating strategy used to identify  $\gamma\delta$ T cells and evaluate the expression of homing phenotype.** Each sample was acquired by a consecutive approach using a single-cell gate (determined by SSC-A/SSC-H parameters), a lymphocyte gate (determined by relative SSC-A/FSC-A), a Live cells gate, a CD3+ cells gate, and a  $\gamma\delta$ TCR gate to determine  $\gamma\delta$ T (CD3+ $\gamma\delta$ TCR+) cells. Samples were then acquired as CLA+ or  $\alpha 4 + \beta 7$ +. This figure illustrates the gating strategy used to determine  $\gamma\delta$ T cells and its phenotype on mock, IVIg, HC IgG and AD IgG culture conditions (from upper to lower panels).

**Figure S2**

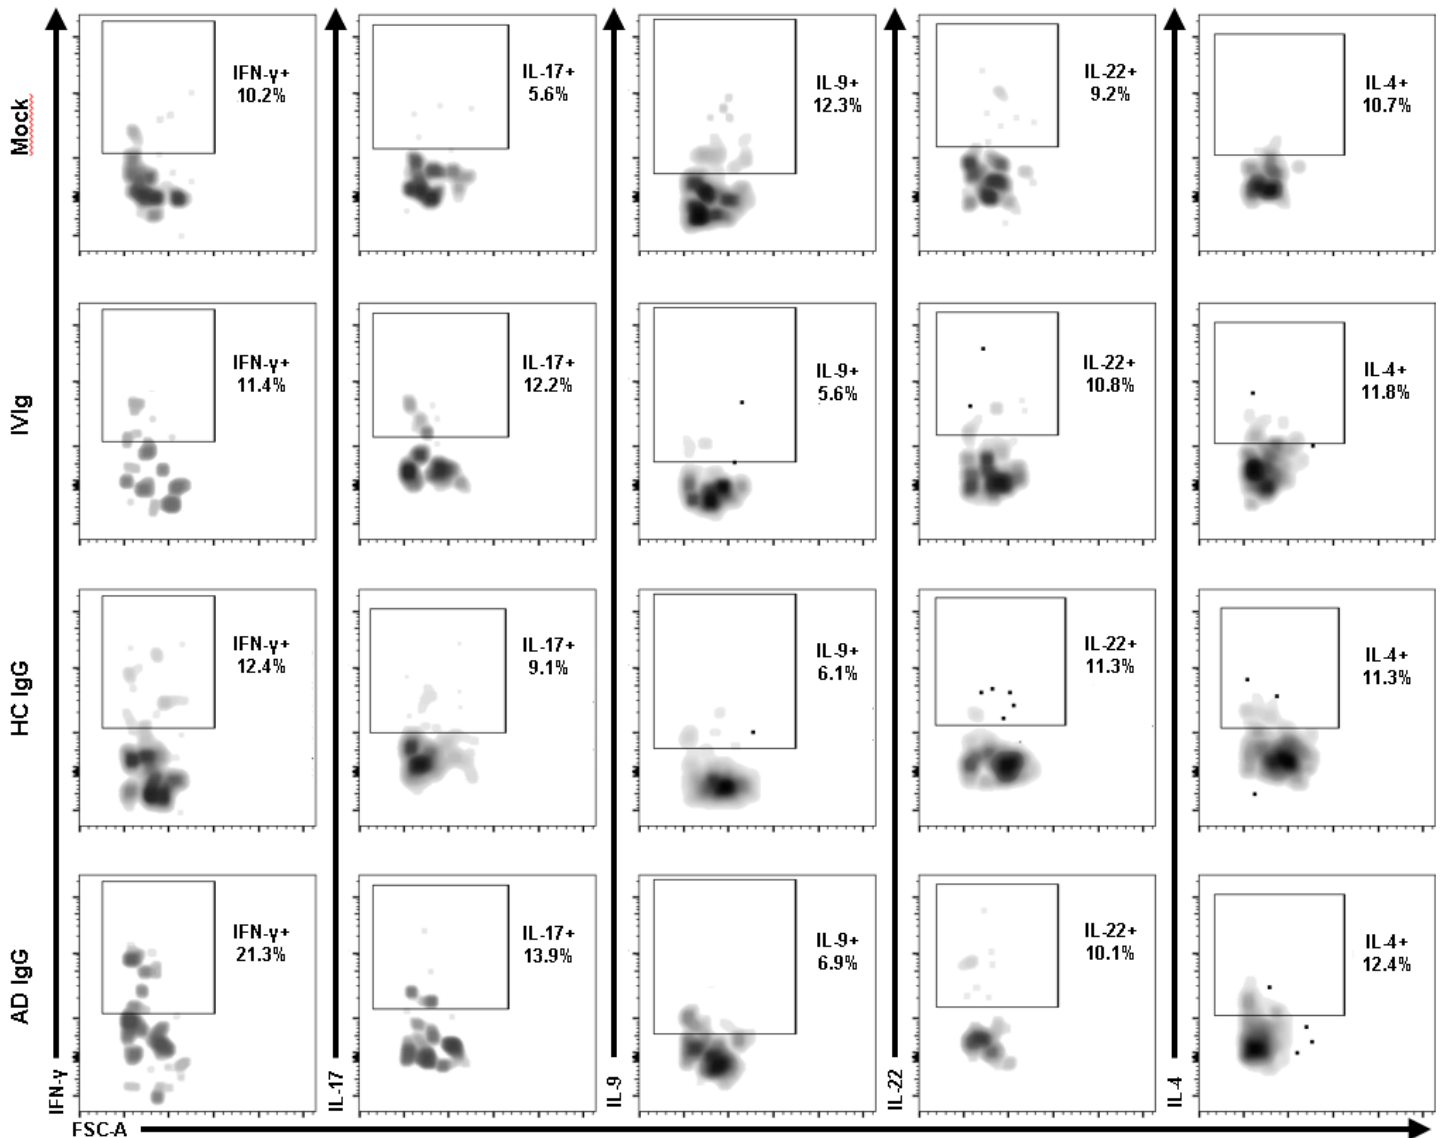

**Figure S2: Illustrative dot plots of the gating strategy used to evaluate the production of cytokines on  $\gamma\delta$ T cells after culture.** Each sample was acquired by a consecutive approach using a single-cell gate (determined by SSC-A/SSC-H parameters), a lymphocyte gate (determined by relative SSC-A/FSC-A), a Live cells gate, CD3+ cells gate and  $\gamma\delta$ TCR+ gating to determine  $\gamma\delta$ T cells. Samples were then acquired as IFN- $\gamma$ +, IL-17+, IL-19+, IL-22+ and IL-4+. This figure illustrates the gating strategy used to evaluate cytokines expression on mock, IVIg, HC IgG and AD IgG culture conditions (from left to right panels).

**Figure S3**

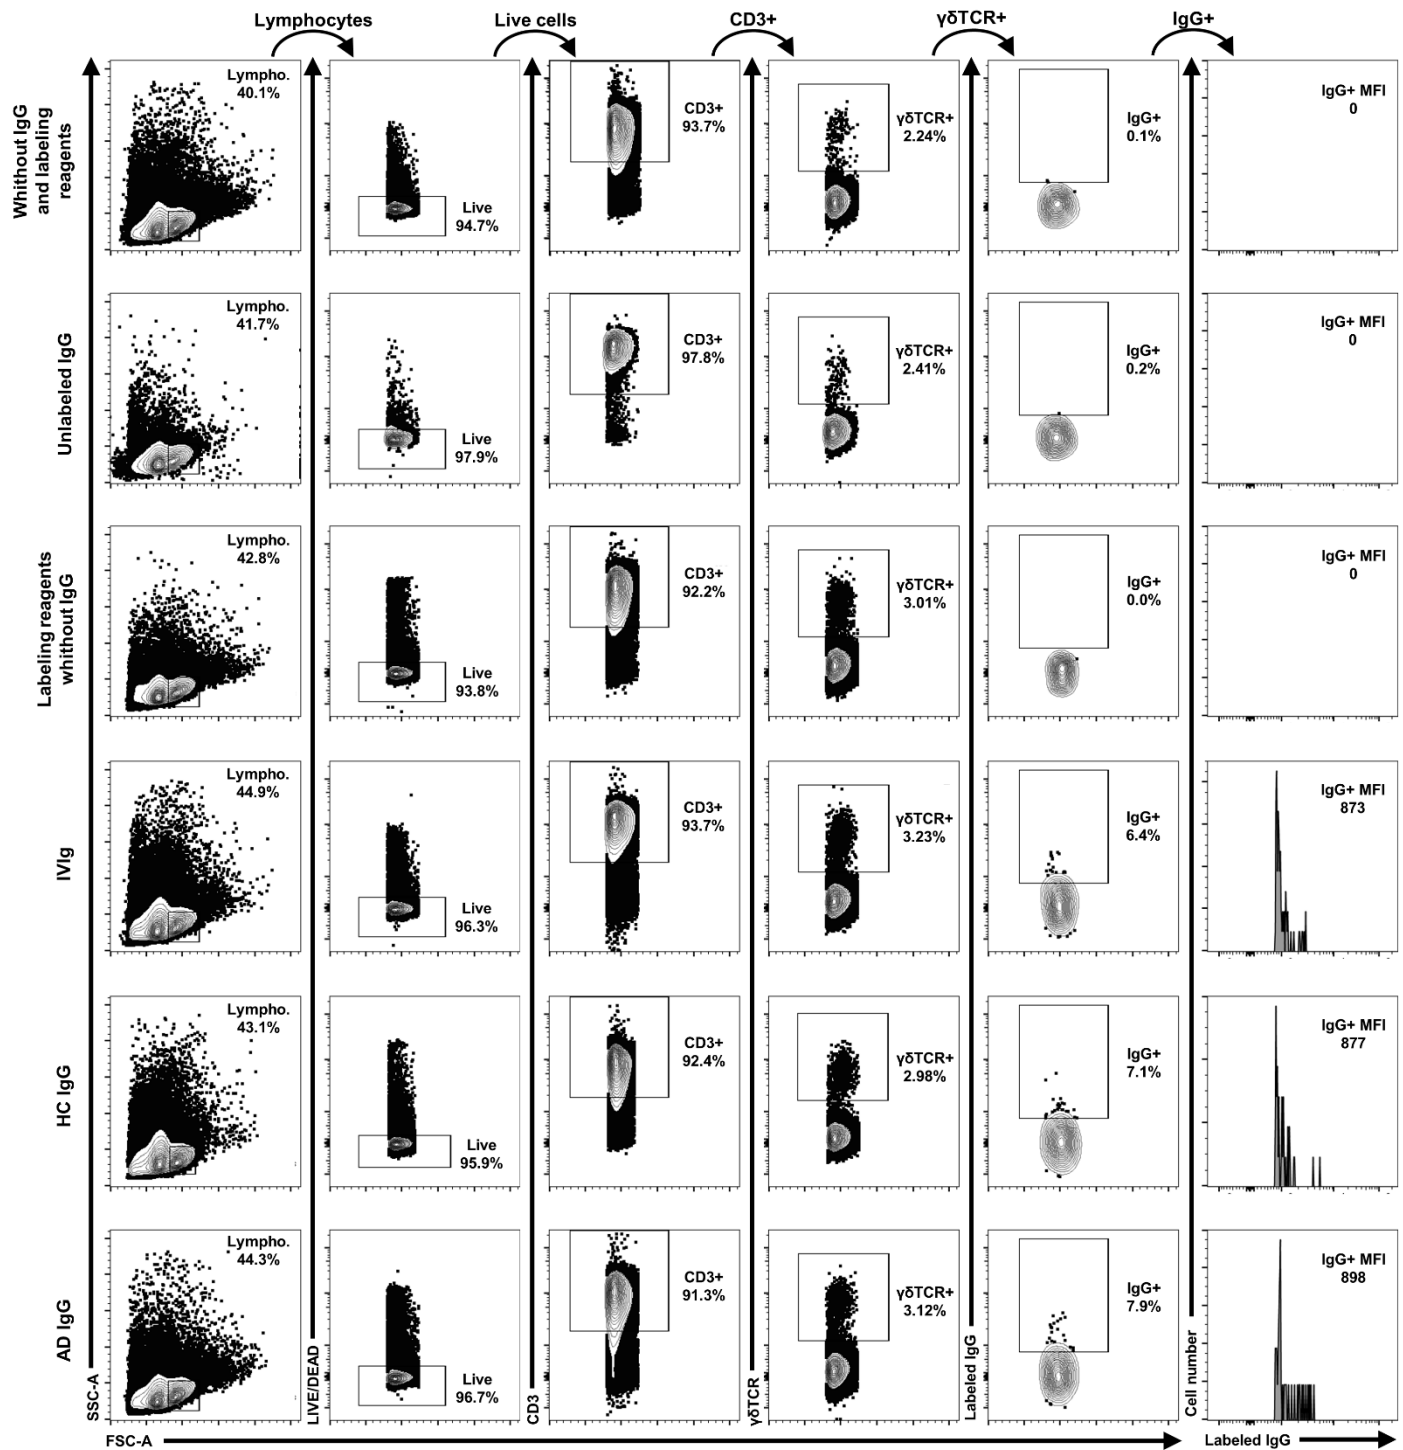

**Figure S3: Illustrative dot plots of the gating strategy used to evaluate IgG-membrane interaction on  $\gamma\delta$ T cells after culture.** Each sample was acquired by a consecutive approach using a single-cell gate (determined by SSC-A/SSC-H parameters), a lymphocyte gate (determined by relative SSC-A/FSC-A), a Live cells gate, CD3+ cells gate and  $\gamma\delta$ TCR+ gating to determine  $\gamma\delta$ T cells. Samples were then acquired in the presence of Zenon human IgG labeling kit reagents but without IgG, in the presence of unlabeled AD IgG (IgG), in the presence of labeled IVIg, labeled IVIg HC IgG, or in the presence of labeled AD IgG. This figure illustrates the gating strategy used to detect IgG-membrane interactions in the cited conditions from upper to lower panels.

**Figure S4**

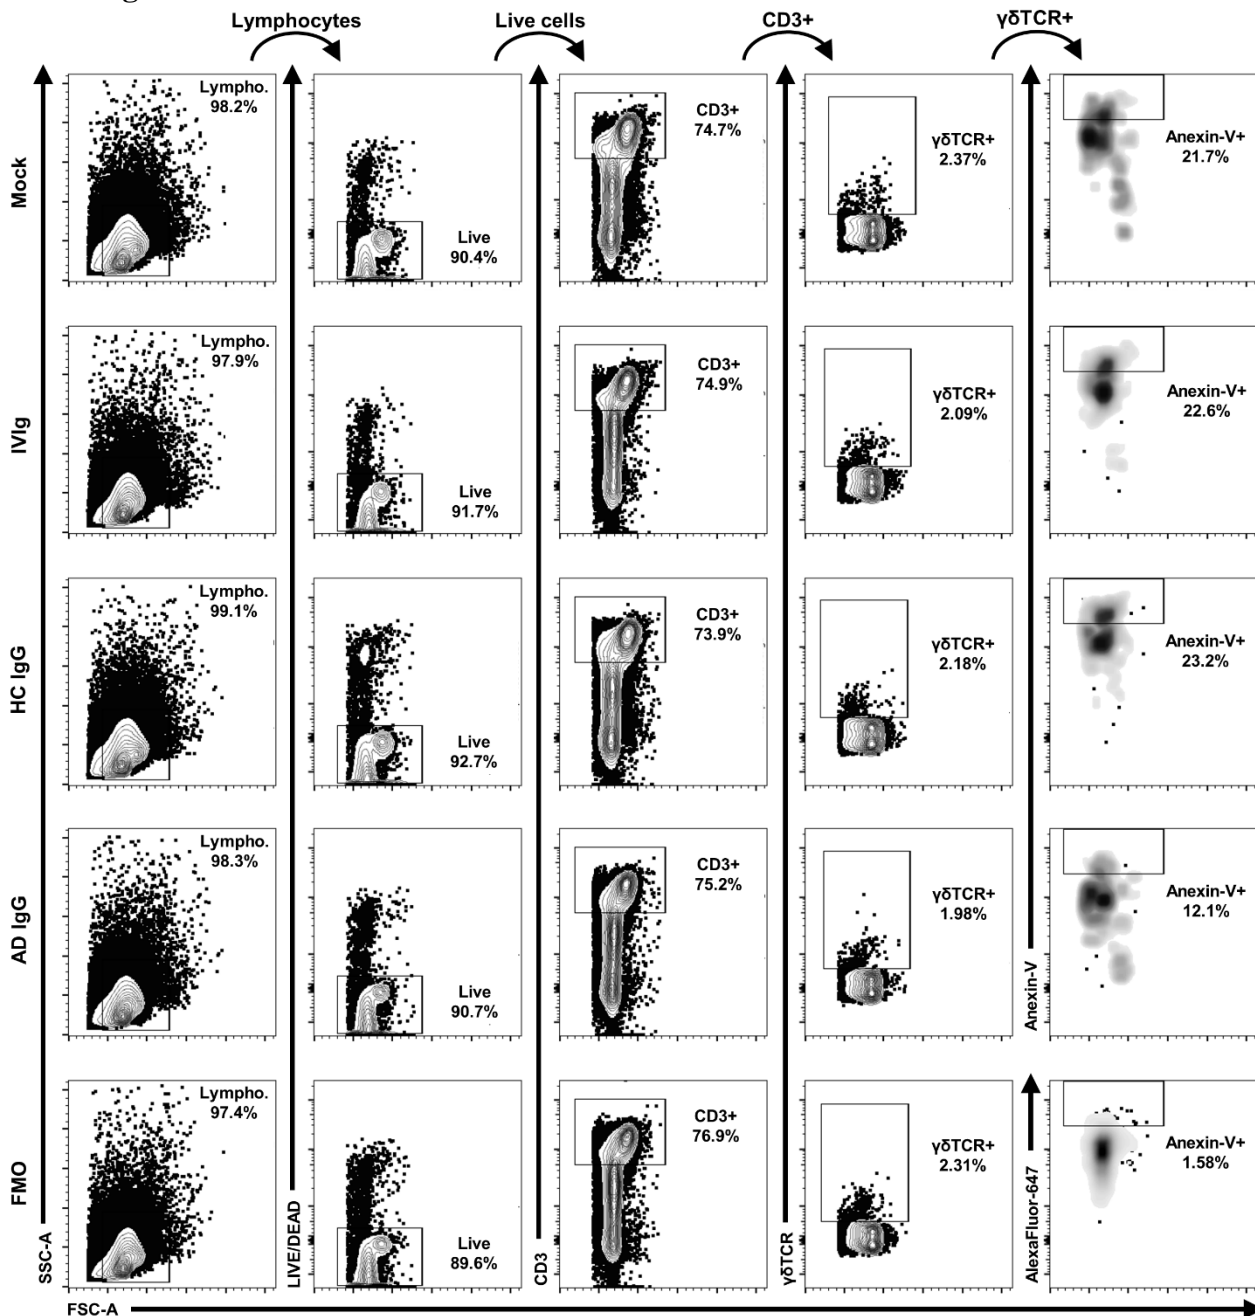

**Figure S4: Illustrative dot plots of the gating strategy used to identify  $\gamma\delta$ T cells and its staining with Annexin V.** Each sample was acquired by a consecutive approach using a single-cell gate (determined by SSC-A/SSC-H parameters), a lymphocyte gate (determined by relative SSC-A/FSC-A), a Live cells gate, a CD3+ cells gate, and a  $\gamma\delta$ TCR gate to determine  $\gamma\delta$ T (CD3+ $\gamma\delta$ TCR+) cells. Samples were then acquired as Annexin V+. This figure illustrates the gating strategy used to determine  $\gamma\delta$ T cells and its Annexin V+ staining on mock, IVIg, HC IgG, AD IgG culture conditions. The lower panel demonstrate the Fluorescence minus one (FMO) gating strategy to precisely determine Annexin V gate.
