# Supplementary material for: IgG from Adult Atopic Dermatitis (AD) Patients Induces Nonatopic Neonatal Thymic Gamma–Delta T Cells (γδT) to Acquire IL-22/IL-17 Secretion Profile with Skin-Homing Properties and Epigenetic Implications Mediated by miRNA
Source: Int J Mol Sci. 2022 Jun 20;23(12):6872. doi: 10.3390/ijms23126872 (PMC9224404; doi:10.3390/ijms23126872)
Supplement: Supplementary file 1 [file ijms-23-06872-s001.zip › Table S1.xlsx]

## Sheet: Target genes
Table S1. List of target genes and pathways obtained with Reactome, KEGG, and GO using MirWalk v3.0
Entrezid	Genesymbol	Description
2099	ESR1	Homo sapiens estrogen receptor 1 (ESR1), transcript variant 1,mRNA.
339745	SPOPL	Homo sapiens speckle type BTB/POZ protein like (SPOPL), mRNA.
65981	CAPRIN2	Homo sapiens caprin family member 2 (CAPRIN2), transcript variant1, mRNA.
65267	WNK3	Homo sapiens WNK lysine deficient protein kinase 3 (WNK3),transcript variant 2, mRNA.
114882	OSBPL8	Homo sapiens oxysterol binding protein like 8 (OSBPL8), transcriptvariant 2, mRNA.
54014	BRWD1	Homo sapiens bromodomain and WD repeat domain containing 1 (BRWD1),transcript variant 3, mRNA.
340485	ACER2	Homo sapiens alkaline ceramidase 2 (ACER2), mRNA.
23112	TNRC6B	Homo sapiens trinucleotide repeat containing adaptor 6B (TNRC6B),transcript variant 3, mRNA.
23543	RBFOX2	Homo sapiens RNA binding fox-1 homolog 2 (RBFOX2), transcriptvariant 1, mRNA.
64859	NABP1	Homo sapiens nucleic acid binding protein 1 (NABP1), transcriptvariant 1, mRNA.
57649	PHF12	Homo sapiens PHD finger protein 12 (PHF12), transcript variant 1,mRNA.
6241	RRM2	Homo sapiens ribonucleotide reductase regulatory subunit M2 (RRM2),transcript variant 2, mRNA.
64093	SMOC1	Homo sapiens SPARC related modular calcium binding 1 (SMOC1),transcript variant 1, mRNA.
5142	PDE4B	Homo sapiens phosphodiesterase 4B (PDE4B), transcript variant b,mRNA.
131405	TRIM71	Homo sapiens tripartite motif containing 71 (TRIM71), mRNA.
58487	CREBZF	Homo sapiens CREB/ATF bZIP transcription factor (CREBZF),transcript variant 1, mRNA.
53344	CHIC1	Homo sapiens cysteine rich hydrophobic domain 1 (CHIC1), transcriptvariant 1, mRNA.
91748	MIDEAS	Homo sapiens mitotic deacetylase associated SANT domain protein(MIDEAS), transcript variant 2, mRNA.
6925	TCF4	Homo sapiens transcription factor 4 (TCF4), transcript variant 1,mRNA.
341208	HEPHL1	Homo sapiens hephaestin like 1 (HEPHL1), mRNA.
84923	FAM104A	Homo sapiens family with sequence similarity 104 member A(FAM104A), transcript variant 1, mRNA.
90	ACVR1	Homo sapiens activin A receptor type 1 (ACVR1), transcript variant1, mRNA.
79933	SYNPO2L	Homo sapiens synaptopodin 2 like (SYNPO2L), transcript variant 1,mRNA.
54790	TET2	Homo sapiens tet methylcytosine dioxygenase 2 (TET2), transcriptvariant 1, mRNA.
23468	CBX5	Homo sapiens chromobox 5 (CBX5), transcript variant 2, mRNA.
1408	CRY2	Homo sapiens cryptochrome circadian regulator 2 (CRY2), transcriptvariant 2, mRNA.
56916	SMARCAD1	Homo sapiens SWI/SNF-related, matrix-associated actin-dependentregulator of chromatin, subfamily a, containing DEAD/H box 1
57659	ZBTB4	Homo sapiens zinc finger and BTB domain containing 4 (ZBTB4),transcript variant 2, mRNA.
55634	KRBOX4	Homo sapiens KRAB box domain containing 4 (KRBOX4), transcriptvariant 1, mRNA.
23321	TRIM2	Homo sapiens tripartite motif containing 2 (TRIM2), transcriptvariant 2, mRNA.
7222	TRPC3	Homo sapiens transient receptor potential cation channel subfamilyC member 3 (TRPC3), transcript variant 1, mRNA.
5090	PBX3	Homo sapiens PBX homeobox 3 (PBX3), transcript variant 2, mRNA.
9825	SPATA2	Homo sapiens spermatogenesis associated 2 (SPATA2), transcriptvariant 2, mRNA.
23111	SPART	Homo sapiens spartin (SPART), transcript variant 4, mRNA.
83871	RAB34	Homo sapiens RAB34, member RAS oncogene family (RAB34), transcriptvariant 2, mRNA.
79094	CHAC1	Homo sapiens ChaC glutathione specificgamma-glutamylcyclotransferase 1 (CHAC1), transcript variant 2,
84924	ZNF566	Homo sapiens zinc finger protein 566 (ZNF566), transcript variant4, mRNA.
9991	PTBP3	Homo sapiens polypyrimidine tract binding protein 3 (PTBP3),transcript variant 2, mRNA.
55291	PPP6R3	Homo sapiens protein phosphatase 6 regulatory subunit 3 (PPP6R3),transcript variant 4, mRNA.
10795	ZNF268	Homo sapiens zinc finger protein 268 (ZNF268), transcript variant2, mRNA.
55787	TXLNG	Homo sapiens taxilin gamma (TXLNG), transcript variant 2, mRNA.
57799	RAB40C	Homo sapiens RAB40C, member RAS oncogene family (RAB40C),transcript variant 1, mRNA.
2332	FMR1	Homo sapiens FMRP translational regulator 1 (FMR1), transcriptvariant ISO6, mRNA.
4781	NFIB	Homo sapiens nuclear factor I B (NFIB), transcript variant 1, mRNA.
1654	DDX3X	Homo sapiens DEAD-box helicase 3 X-linked (DDX3X), transcriptvariant 2, mRNA.
7049	TGFBR3	Homo sapiens transforming growth factor beta receptor 3 (TGFBR3),transcript variant 2, mRNA.
4084	MXD1	Homo sapiens MAX dimerization protein 1 (MXD1), transcript variant2, mRNA.
4194	MDM4	Homo sapiens MDM4 regulator of p53 (MDM4), transcript variant 2,mRNA.
905	CCNT2	Homo sapiens cyclin T2 (CCNT2), transcript variant a, mRNA.
1182	CLCN3	Homo sapiens chloride voltage-gated channel 3 (CLCN3), transcriptvariant a, mRNA.
90627	STARD13	Homo sapiens StAR related lipid transfer domain containing 13(STARD13), transcript variant 5, mRNA.
990	CDC6	Homo sapiens cell division cycle 6 (CDC6), mRNA.
126526	C19orf47	Homo sapiens chromosome 19 open reading frame 47 (C19orf47),transcript variant 1, mRNA.
1656	DDX6	Homo sapiens DEAD-box helicase 6 (DDX6), transcript variant 2,mRNA.
1024	CDK8	Homo sapiens cyclin dependent kinase 8 (CDK8), transcript variant1, mRNA.
51527	GSKIP	Homo sapiens GSK3B interacting protein (GSKIP), transcript variant1, mRNA.
55432	YOD1	Homo sapiens YOD1 deubiquitinase (YOD1), transcript variant 2,mRNA.
2649	NR6A1	Homo sapiens nuclear receptor subfamily 6 group A member 1 (NR6A1),transcript variant 4, mRNA.
6836	SURF4	Homo sapiens surfeit 4 (SURF4), transcript variant 2, mRNA.
8243	SMC1A	Homo sapiens structural maintenance of chromosomes 1A (SMC1A),transcript variant 2, mRNA.
55031	USP47	Homo sapiens ubiquitin specific peptidase 47 (USP47), transcriptvariant 1, mRNA.
4293	MAP3K9	Homo sapiens mitogen-activated protein kinase kinase kinase 9(MAP3K9), transcript variant 2, mRNA.
23446	SLC44A1	Homo sapiens solute carrier family 44 member 1 (SLC44A1),transcript variant 2, mRNA.
54899	PXK	Homo sapiens PX domain containing serine/threonine kinase like(PXK), transcript variant 2, mRNA.
23271	CAMSAP2	Homo sapiens calmodulin regulated spectrin associated proteinfamily member 2 (CAMSAP2), transcript variant 1, mRNA.
8091	HMGA2	Homo sapiens high mobility group AT-hook 2 (HMGA2), transcriptvariant 3, mRNA.
23097	CDK19	Homo sapiens cyclin dependent kinase 19 (CDK19), transcript variant2, mRNA.
9444	QKI	Homo sapiens QKI, KH domain containing RNA binding (QKI),transcript variant 5, mRNA.
10620	ARID3B	Homo sapiens AT-rich interaction domain 3B (ARID3B), transcriptvariant 1, mRNA.
80012	PHC3	Homo sapiens polyhomeotic homolog 3 (PHC3), transcript variant 2,mRNA.
80315	CPEB4	Homo sapiens cytoplasmic polyadenylation element binding protein 4(CPEB4), transcript variant 2, mRNA.
9397	NMT2	Homo sapiens N-myristoyltransferase 2 (NMT2), transcript variant 2,mRNA.
23204	ARL6IP1	Homo sapiens ADP ribosylation factor like GTPase 6 interactingprotein 1 (ARL6IP1), transcript variant 2, mRNA.
55425	GPALPP1	Homo sapiens GPALPP motifs containing 1 (GPALPP1), transcriptvariant 1, mRNA.
84328	LZIC	Homo sapiens leucine zipper and CTNNBIP1 domain containing (LZIC),transcript variant 2, mRNA.
26523	2001-08-01	Homo sapiens argonaute RISC component 1 (AGO1), transcript variant1, mRNA.
9772	TMEM94	Homo sapiens transmembrane protein 94 (TMEM94), transcript variant2, mRNA.
79718	TBL1XR1	Homo sapiens TBL1X receptor 1 (TBL1XR1), transcript variant 2,mRNA.
201626	PDE12	Homo sapiens phosphodiesterase 12 (PDE12), transcript variant 2,mRNA.
124540	MSI2	Homo sapiens musashi RNA binding protein 2 (MSI2), transcriptvariant 3, mRNA.
53981	CPSF2	Homo sapiens cleavage and polyadenylation specific factor 2(CPSF2), transcript variant 2, mRNA.
57546	PDP2	Homo sapiens pyruvate dehyrogenase phosphatase catalytic subunit 2(PDP2), transcript variant 2, mRNA; nuclear gene for mitochondrial
5468	PPARG	Homo sapiens peroxisome proliferator activated receptor gamma(PPARG), transcript variant 5, mRNA.
64375	IKZF4	Homo sapiens IKAROS family zinc finger 4 (IKZF4), transcriptvariant 2, mRNA.
79602	ADIPOR2	Homo sapiens adiponectin receptor 2 (ADIPOR2), transcript variant1, mRNA.
57507	ZNF608	Homo sapiens zinc finger protein 608 (ZNF608), transcript variant2, mRNA.
382	ARF6	Homo sapiens ADP ribosylation factor 6 (ARF6), mRNA.
3840	KPNA4	Homo sapiens karyopherin subunit alpha 4 (KPNA4), mRNA.
3930	LBR	Homo sapiens lamin B receptor (LBR), transcript variant 1, mRNA.
4294	MAP3K10	Homo sapiens mitogen-activated protein kinase kinase kinase 10(MAP3K10), mRNA.
5326	PLAGL2	Homo sapiens PLAG1 like zinc finger 2 (PLAGL2), mRNA.
7064	THOP1	Homo sapiens thimet oligopeptidase 1 (THOP1), mRNA.
8613	PLPP3	Homo sapiens phospholipid phosphatase 3 (PLPP3), mRNA.
8932	MBD2	Homo sapiens methyl-CpG binding domain protein 2 (MBD2), transcriptvariant 1, mRNA.
6319	SCD	Homo sapiens stearoyl-CoA desaturase (SCD), mRNA.
10643	IGF2BP3	Homo sapiens insulin like growth factor 2 mRNA binding protein 3(IGF2BP3), mRNA.
23633	KPNA6	Homo sapiens karyopherin subunit alpha 6 (KPNA6), mRNA.
9925	ZBTB5	Homo sapiens zinc finger and BTB domain containing 5 (ZBTB5), mRNA.
23129	PLXND1	Homo sapiens plexin D1 (PLXND1), mRNA.
23174	ZCCHC14	Homo sapiens zinc finger CCHC-type containing 14 (ZCCHC14), mRNA.
23503	ZFYVE26	Homo sapiens zinc finger FYVE-type containing 26 (ZFYVE26), mRNA.
51132	RLIM	Homo sapiens ring finger protein, LIM domain interacting (RLIM),transcript variant 1, mRNA.
51701	NLK	Homo sapiens nemo like kinase (NLK), mRNA.
84146	ZNF644	Homo sapiens zinc finger protein 644 (ZNF644), transcript variant3, mRNA.
51804	SIX4	Homo sapiens SIX homeobox 4 (SIX4), mRNA.
54891	INO80D	Homo sapiens INO80 complex subunit D (INO80D), mRNA.
54910	SEMA4C	Homo sapiens semaphorin 4C (SEMA4C), mRNA.
57722	IGDCC4	Homo sapiens immunoglobulin superfamily DCC subclass member 4(IGDCC4), mRNA.
58528	RRAGD	Homo sapiens Ras related GTP binding D (RRAGD), mRNA.
79666	PLEKHF2	Homo sapiens pleckstrin homology and FYVE domain containing 2(PLEKHF2), mRNA.
80774	LIMD2	Homo sapiens LIM domain containing 2 (LIMD2), mRNA.
80311	KLHL15	Homo sapiens kelch like family member 15 (KLHL15), mRNA.
84919	PPP1R15B	Homo sapiens protein phosphatase 1 regulatory subunit 15B(PPP1R15B), mRNA.
5814	PURB	Homo sapiens purine rich element binding protein B (PURB), mRNA.
131566	DCBLD2	Homo sapiens discoidin, CUB and LCCL domain containing 2 (DCBLD2),mRNA.
140775	SMCR8	Homo sapiens SMCR8-C9orf72 complex subunit (SMCR8), mRNA.
134266	GRPEL2	Homo sapiens GrpE like 2, mitochondrial (GRPEL2), mRNA; nucleargene for mitochondrial product.
205327	C2orf69	Homo sapiens chromosome 2 open reading frame 69 (C2orf69), mRNA.
27164	SALL3	Homo sapiens spalt like transcription factor 3 (SALL3), mRNA.
254048	UBN2	Homo sapiens ubinuclein 2 (UBN2), mRNA.
91404	SESTD1	Homo sapiens SEC14 and spectrin domain containing 1 (SESTD1), mRNA.
339983	NAT8L	Homo sapiens N-acetyltransferase 8 like (NAT8L), mRNA.

## Sheet: Reactome
Name	Hits	Pop Hits	List Total	Pop Total	Genes	Pvalue	adjusted Pvalue(BH)
R-HSA-381340_Transcriptional regulation of white adipocyte differentiation	7	133	69	10812	CDK8;CDK19;TBL1XR1;PPARG	0.0	0.0
R-HSA-8986944_Transcriptional Regulation by MECP2	8	74	69	10812	TNRC6B;TRPC3;AGO1;TBL1XR1;PPARG;LBR	0.0	0.0
R-HSA-73857_RNA Polymerase II Transcription	27	1628	69	10812	ESR1;TNRC6B;NABP1;RRM2;CBX5;KRBOX4;TRPC3;ZNF566;ZNF268;MDM4;CCNT2;CDK8;NR6A1;PHC3;AGO1;TBL1XR1;CPSF2;PPARG;LBR;RRAGD	0.0001	0.0008
R-HSA-74160_Gene expression (Transcription)	30	1838	69	10812	ESR1;TNRC6B;NABP1;RRM2;TET2;CBX5;KRBOX4;TRPC3;ZNF566;ZNF268;NFIB;MDM4;CCNT2;CDK8;NR6A1;PHC3;AGO1;TBL1XR1;CPSF2;PPARG;LBR;MBD2;RRAGD	0.0001	0.0008
R-HSA-212436_Generic Transcription Pathway	23	1439	69	10812	ESR1;TNRC6B;RRM2;CBX5;KRBOX4;TRPC3;ZNF566;ZNF268;MDM4;CCNT2;CDK8;NR6A1;PHC3;AGO1;TBL1XR1;PPARG;LBR;RRAGD	0.0003	0.0015
R-HSA-6807070_PTEN Regulation	7	177	69	10812	TNRC6B;PHC3;AGO1;PPARG;RRAGD	0.0003	0.0015
R-HSA-8943724_Regulation of PTEN gene transcription	5	98	69	10812	PHC3;PPARG;RRAGD	0.0006	0.0026
R-HSA-1257604_PIP3 activates AKT signaling	8	307	69	10812	ESR1;TNRC6B;PHC3;AGO1;PPARG;RRAGD	0.0014	0.0052
R-HSA-1989781_PPARA activates gene expression	5	134	69	10812	CDK8;CDK19;TBL1XR1;PPARG	0.0024	0.0075
R-HSA-400206_Regulation of lipid metabolism by PPARalpha	5	136	69	10812	CDK8;CDK19;TBL1XR1;PPARG	0.0025	0.0075
R-HSA-9006925_Intracellular signaling by second messengers	8	360	69	10812	ESR1;TNRC6B;PHC3;AGO1;PPARG;RRAGD	0.0036	0.0098
R-HSA-3108232_SUMO E3 ligases SUMOylate target proteins	6	231	69	10812	ESR1;CBX5;SMC1A;PHC3;PPARG	0.0052	0.013
R-HSA-2990846_SUMOylation	6	239	69	10812	ESR1;CBX5;SMC1A;PHC3;PPARG	0.0061	0.0141
R-HSA-2559583_Cellular Senescence	5	208	69	10812	TNRC6B;MDM4;HMGA2;PHC3;AGO1	0.0137	0.0294
R-HSA-9006931_Signaling by Nuclear Receptors	6	305	69	10812	ESR1;TNRC6B;SMC1A;AGO1;TBL1XR1;SCD	0.0178	0.0356
R-HSA-556833_Metabolism of lipids	11	786	69	10812	OSBPL8;ACER2;CDK8;SLC44A1;CDK19;TBL1XR1;PPARG;LBR;PLPP3;SCD	0.0195	0.0366
R-HSA-157118_Signaling by NOTCH	5	280	69	10812	TNRC6B;CDK8;AGO1;TBL1XR1;PLXND1	0.0404	0.0713
R-HSA-5688426_Deubiquitination	5	306	69	10812	ESR1;MDM4;YOD1;USP47;INO80D	0.0547	0.0912
R-HSA-3700989_Transcriptional Regulation by TP53	5	365	69	10812	TNRC6B;MDM4;CCNT2;AGO1;RRAGD	0.0961	0.1508
R-HSA-2262752_Cellular responses to stress	9	823	69	10812	TNRC6B;CHAC1;MDM4;HMGA2;PHC3;AGO1;TBL1XR1;RRAGD	0.1005	0.1508
R-HSA-8953897_Cellular responses to stimuli	9	841	69	10812	TNRC6B;CHAC1;MDM4;HMGA2;PHC3;AGO1;TBL1XR1;RRAGD	0.1102	0.1574
R-HSA-1266738_Developmental Biology	12	1378	69	10812	TCF4;TRPC3;CDK8;NR6A1;CDK19;TBL1XR1;PPARG;PLXND1	0.2022	0.2683
R-HSA-597592_Post-translational protein modification	13	1517	69	10812	ESR1;CBX5;RAB34;PPP6R3;RAB40C;MDM4;YOD1;SMC1A;USP47;PHC3;PPARG;INO80D	0.2057	0.2683
R-HSA-162582_Signal Transduction	25	3183	69	10812	ESR1;SPOPL;TNRC6B;RBFOX2;PDE4B;TRPC3;CCNT2;STARD13;CDK8;SMC1A;PHC3;AGO1;TBL1XR1;MSI2;PPARG;ARF6;LBR;SCD;PLXND1;NLK;RRAGD	0.2196	0.2745
R-HSA-1430728_Metabolism	17	2274	69	10812	OSBPL8;ACER2;RRM2;CHAC1;CDK8;SLC44A1;CDK19;TBL1XR1;PDP2;PPARG;ADIPOR2;LBR;PLPP3;SCD;NAT8L	0.3211	0.3789
R-HSA-1640170_Cell Cycle	7	860	69	10812	RRM2;PPP6R3;MDM4;CDC6;SMC1A;LBR	0.3284	0.3789
R-HSA-1280215_Cytokine Signaling in Immune system	5	825	69	10812	BRWD1;TRIM2;PDE12;KPNA4	0.6096	0.6773
R-HSA-392499_Metabolism of proteins	13	2265	69	10812	ESR1;CBX5;RAB34;PPP6R3;RAB40C;MDM4;YOD1;SMC1A;USP47;PHC3;PPARG;INO80D	0.6814	0.7301
R-HSA-168256_Immune System	10	2341	69	10812	BRWD1;TRIM71;TRIM2;DDX3X;SURF4;PDE12;KPNA4;THOP1;RLIM	0.9148	0.9463
R-HSA-1643685_Disease	8	2153	69	10812	ESR1;CCNT2;CDK8;QKI;NMT2;TBL1XR1;KPNA4	0.9543	0.9543

## Sheet: KEGG
Name	Hits	Pop Hits	List Total	Pop Total	Genes	Pvalue	adjusted Pvalue(BH)
hsa05202_Transcriptional_misregulation_in_cancer	5	186	46	8019	PBX3;CCNT2;HMGA2;PPARG;SIX4	0.0062	0.0124
hsa01100_Metabolic_pathways	8	1489	46	8019	ACER2;RRM2;PDE4B;CHAC1;LBR;PLPP3;SCD;NAT8L	0.6253	0.6253

## Sheet: GO-BP
Name	Hits	Pop Hits	List Total	Pop Total	Genes	Pvalue	adjusted Pvalue(BH)
GO:0007179_transforming_growth_factor_beta_receptor_signaling_pathway	7	143	104	18160	ACVR1;TGFBR3;NLK	0.0	0.0
GO:0017148_negative_regulation_of_translation	7	92	104	18160	CAPRIN2;TRIM71;FMR1;DDX3X;DDX6;IGF2BP3	0.0	0.0
GO:0045892_negative_regulation_of_transcription,_DNA-templated	21	647	104	18160	RBFOX2;PHF12;CREBZF;MIDEAS;CBX5;CRY2;ZBTB4;USP47;HMGA2;PHC3;PPARG;IKZF4;MAP3K10;MBD2;RLIM;SIX4	0.0	0.0
GO:0030308_negative_regulation_of_cell_growth	5	128	104	18160	CAPRIN2;DDX3X;PPARG;ADIPOR2;DCBLD2	0.0012	0.0063
GO:0006397_mRNA_processing	5	157	104	18160	RBFOX2;PTBP3;FMR1;QKI;PDE12	0.0028	0.0118
GO:0090263_positive_regulation_of_canonical_Wnt_signaling_pathway	5	166	104	18160	CAPRIN2;DDX3X;GSKIP;USP47;TBL1XR1	0.0035	0.0122
GO:0016579_protein_deubiquitination	7	350	104	18160	ESR1;MDM4;YOD1;USP47;INO80D	0.0056	0.0147
GO:0051301_cell_division	7	351	104	18160	SPART;CCNT2;CDC6;SMC1A;HMGA2;ARF6	0.0056	0.0147
GO:0006974_cellular_response_to_DNA_damage_stimulus	6	281	104	18160	ACER2;NABP1;CBX5;ZBTB4;FMR1;USP47	0.0073	0.017
GO:0006355_regulation_of_transcription,_DNA-templated	8	533	104	18160	ESR1;PHF12;ZBTB4;KRBOX4;ZNF268;HMGA2;NLK	0.0156	0.0248
GO:0006468_protein_phosphorylation	8	546	104	18160	WNK3;ACVR1;CDK8;MAP3K9;CDK19;NLK	0.0177	0.0248
GO:0035556_intracellular_signal_transduction	7	416	104	18160	WNK3;RAB40C;DDX3X;TGFBR3;NLK	0.0132	0.0248
GO:0043066_negative_regulation_of_apoptotic_process	8	544	104	18160	WNK3;ZNF268;DDX3X;MDM4;USP47;HMGA2;ARL6IP1;SIX4	0.0173	0.0248
GO:0043161_proteasome-mediated_ubiquitin-dependent_protein_catabolic_process	5	234	104	18160	SPOPL;TRIM71;TRIM2;TBL1XR1	0.0136	0.0248
GO:0045893_positive_regulation_of_transcription,_DNA-templated	10	752	104	18160	ESR1;TCF4;ACVR1;NFIB;HMGA2;TBL1XR1;PPARG;SIX4	0.0162	0.0248
GO:0010629_negative_regulation_of_gene_expression	5	272	104	18160	ESR1;TNRC6B;AGO1;ADIPOR2;SMCR8	0.0239	0.0314
GO:0043065_positive_regulation_of_apoptotic_process	6	393	104	18160	ZNF268;DDX3X;MAP3K9;HMGA2;CDK19;MAP3K10	0.0308	0.038
GO:0007399_nervous_system_development	5	330	104	18160	RBFOX2;TCF4;FMR1;ARF6;IGF2BP3	0.0473	0.0552
GO:0030154_cell_differentiation	7	611	104	18160	SMOC1;TCF4;ZNF268;DDX3X;PPARG;ARF6;PURB	0.0721	0.0797
GO:0010628_positive_regulation_of_gene_expression	5	466	104	18160	TNRC6B;DDX3X;HMGA2;QKI;AGO1	0.1401	0.1471
GO:0016567_protein_ubiquitination	5	678	104	18160	SPOPL;RAB40C;RLIM;KLHL15	0.357	0.357

## Sheet: GO-CC
Name	Hits	Pop Hits	List Total	Pop Total	Genes	Pvalue	adjusted Pvalue(BH)
GO:0000932_P-body	7	116	86	12816	TNRC6B;TRIM71;DDX6;AGO1	0.0	0.0
GO:0005844_polysome	5	42	86	12816	FMR1;AGO1;MSI2	0.0	0.0
GO:0000118_histone_deacetylase_complex	5	54	86	12816	MIDEAS;CBX5;TBL1XR1;MBD2	0.0001	0.0003
GO:0005667_transcription_regulator_complex	5	203	86	12816	MIDEAS;TCF4;NR6A1;SIX4	0.0148	0.037
GO:0014069_postsynaptic_density	5	270	86	12816	PDE4B;FMR1;CPEB4;SEMA4C	0.0416	0.0832
GO:0005813_centrosome	7	631	86	12816	CAPRIN2;PDE4B;DDX3X;CAMSAP2;ZFYVE26;RRAGD	0.1486	0.2123
GO:0048471_perinuclear_region_of_cytoplasm	8	734	86	12816	PDE4B;RAB34;RAB40C;FMR1;CCNT2;DDX6;CPEB4;PPARG	0.1388	0.2123
GO:0032991_protein-containing_complex	7	679	86	12816	ESR1;CBX5;CDK8;PXK;IKZF4;MBD2	0.1894	0.2368
GO:0000139_Golgi_membrane	5	682	86	12816	ACER2;PPP6R3;CLCN3;SURF4;PLPP3	0.4901	0.5446
GO:0043231_intracellular_membrane-bounded_organelle	5	923	86	12816	OSBPL8;CLCN3;MSI2;PPARG;RRAGD	0.7392	0.7392

## Sheet: GO-MF
Name	Hits	Pop Hits	List Total	Pop Total	Genes	Pvalue	adjusted Pvalue(BH)
GO:0003729_mRNA_binding	9	222	100	15238	RBFOX2;PTBP3;FMR1;DDX3X;DDX6;QKI;MBD2;IGF2BP3;PURB	0.0	0.0
GO:0004879_nuclear_receptor_activity	6	81	100	15238	ESR1;NR6A1;PPARG	0.0	0.0
GO:0003714_transcription_corepressor_activity	9	245	100	15238	RBFOX2;PHF12;MIDEAS;HMGA2;TBL1XR1;MAP3K10;RLIM	0.0001	0.0005
GO:0046332_SMAD_binding	5	62	100	15238	ACVR1;TGFBR3;HMGA2;PURB	0.0001	0.0005
GO:0003677_DNA_binding	18	984	100	15238	NABP1;CREBZF;MIDEAS;TCF4;TET2;CRY2;SMARCAD1;ZNF268;NFIB;DDX3X;NR6A1;SMC1A;ARID3B;PHC3;PPARG;LBR	0.0003	0.0012
GO:0000976_transcription_regulatory_region_sequence-specific_DNA_binding	7	228	100	15238	CREBZF;CRY2;HMGA2;TBL1XR1;PPARG	0.0012	0.004
GO:0008134_transcription_factor_binding	8	310	100	15238	ESR1;RBFOX2;TXLNG;DDX3X;HMGA2;PPARG;NLK;PURB	0.0016	0.0046
GO:0003730_mRNA_3'-UTR_binding	5	171	100	15238	FMR1;CPEB4;IGF2BP3	0.0069	0.0153
GO:0004672_protein_kinase_activity	6	237	100	15238	WNK3;ACVR1;CDK8;MAP3K9;MAP3K10;NLK	0.0063	0.0153
GO:0001227_DNA-binding_transcription_repressor_activity,_RNA_polymerase_II-specific	7	335	100	15238	ZBTB4;ZNF566;MXD1;PPARG;ZBTB5;PURB	0.009	0.018
GO:0003682_chromatin_binding	8	439	100	15238	ESR1;CBX5;SMARCAD1;FMR1;CCNT2;SMC1A;PHC3;PPARG	0.0116	0.0211
GO:0001228_DNA-binding_transcription_activator_activity,_RNA_polymerase_II-specific	8	500	100	15238	ESR1;TCF4;ZNF268;NFIB;MDM4;NR6A1;PLAGL2;SIX4	0.0228	0.0351
GO:0003700_DNA-binding_transcription_factor_activity	8	497	100	15238	ESR1;TCF4;ZNF268;PPARG;IKZF4;PLAGL2	0.0221	0.0351
GO:0004674_protein_serinethreonine_kinase_activity	9	609	100	15238	WNK3;ACVR1;MAP3K9;MAP3K10;NLK	0.0256	0.0366
GO:0043565_sequence-specific_DNA_binding	5	264	100	15238	ZBTB4;NR6A1;PPARG;PLAGL2	0.0352	0.0469
GO:0003924_GTPase_activity	6	412	100	15238	RAB34;RAB40C;DDX3X;ARF6;RRAGD	0.0629	0.0786
GO:0005525_GTP_binding	6	427	100	15238	RAB34;RAB40C;ARF6;RRAGD	0.0717	0.0797
GO:0008270_zinc_ion_binding	10	854	100	15238	ESR1;TRIM71;TET2;TRIM2;MDM4;NR6A1;PHC3;PPARG;IKZF4;ZCCHC14	0.0688	0.0797
GO:0042803_protein_homodimerization_activity	8	689	100	15238	ACVR1;ZBTB4;FMR1;NR6A1;MAP3K9;MAP3K10;GRPEL2	0.0981	0.1033
GO:1990837_sequence-specific_double-stranded_DNA_binding	5	566	100	15238	ESR1;TCF4;NFIB;NR6A1;SIX4	0.325	0.325
